# Supplementary material for: Intermittency of Arctic–mid-latitude teleconnections: stratospheric pathway between autumn sea ice and the winter North Atlantic Oscillation
Source: Copernicus journal article supplement (doi:10.5194/wcd-1-261-2020), 2020-05-12
Supplement: Supplementary file 1 [file wcd-1-261-2020-supplement.pdf]

Supplement of Weather Clim. Dynam., 1, 261–275, 2020  
<https://doi.org/10.5194/wcd-1-261-2020-supplement>  
© Author(s) 2020. This work is distributed under  
the Creative Commons Attribution 4.0 License.

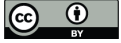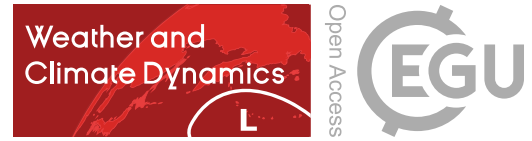

*Supplement of*

## **Intermittency of Arctic–mid-latitude teleconnections: stratospheric pathway between autumn sea ice and the winter North Atlantic Oscillation**

**Peter Yu Feng Siew et al.**

*Correspondence to:* Peter Yu Feng Siew (yu.siew@uib.no)

The copyright of individual parts of the supplement might differ from the CC BY 4.0 License.

## List of Figures

|   |                                                                                                                                                                                                                                                                                                                                                                         |   |
|---|-------------------------------------------------------------------------------------------------------------------------------------------------------------------------------------------------------------------------------------------------------------------------------------------------------------------------------------------------------------------------|---|
| 1 | As in Fig. 3, but showing the beta coefficients (colours) of all detected casual linkages. Note that no simultaneous relationships are shown here, including $\uparrow \text{URALS}_{Dec} \Rightarrow \uparrow \text{V}^* \text{T}^*_{Dec}$ (coloured horizontal line in Fig. 3a). . . . .                                                                              | 2 |
| 2 | The unaggregated version of the half-monthly CEN, equivalent to Fig. S1b after aggregation. . . . .                                                                                                                                                                                                                                                                     | 3 |
| 3 | Pentad version of the monthly (Fig. 3a, S1a) and half-monthly (Fig. 3b, S1b) CENs. A 1% significance level is used in the second step (see Data and Methods 2.2). A maximum lag of 12 pentads (i.e., 2 months) is allowed. Autocorrelation is not used to reject causal linkages in the partial correlation tests here. . . . .                                         | 4 |
| 4 | As in Fig. 3, but using AIC with another significance set (5%, 10%, 20%, 30%, 40%, 50%). . . . .                                                                                                                                                                                                                                                                        | 5 |
| 5 | The correlation between October (red) and November (blue) Barents-Kara sea ice indices, and NAO from October to March. Outer grey lines show significant correlations at a 5% level using a two-tailed t-test. . . . .                                                                                                                                                  | 5 |
| 6 | As in Fig. 3a, but highlighting all ICE-NAO stratospheric and tropospheric pathways. . . . .                                                                                                                                                                                                                                                                            | 6 |
| 7 | Same as Fig. S1a, but additionally showing the occurrences rates of all linkages in the bootstrapping test. . . . .                                                                                                                                                                                                                                                     | 7 |
| 8 | Results of the pentad CEN analysis assessing relationships between downward longwave radiation (IR), Barents-Kara sea ice (ICE) and Urals sea level pressure (URALS). A maximum lag of 2 pentads is allowed. Autocorrelation is not calculated. Fig. 7 is aggregated from this figure by summing the number of times each linkage appears in individual months. . . . . | 8 |
| 9 | Monthly CEN as in Fig. S1a, but with the addition of downward longwave radiation (IR). . . . .                                                                                                                                                                                                                                                                          | 9 |

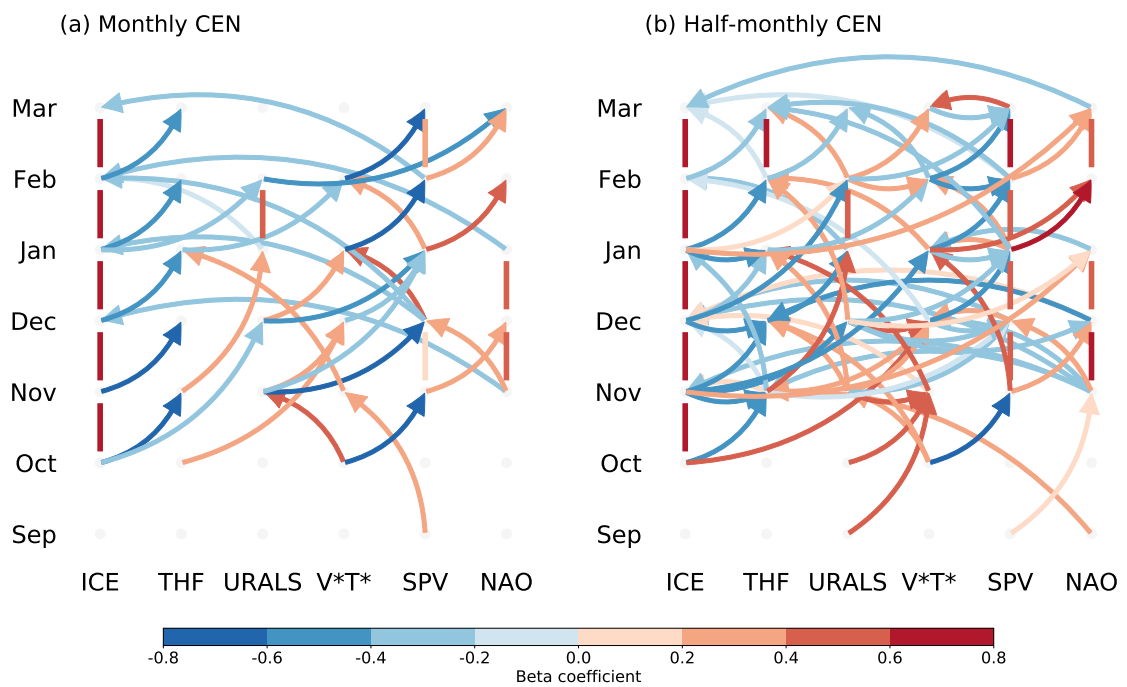

Figure S1: As in Fig. 3, but showing the beta coefficients (colours) of all detected casual linkages. Note that no simultaneous relationships are shown here, including  $\uparrow \text{URALS}_{Dec} \Rightarrow \uparrow \text{V}^*\text{T}^*_{Dec}$  (coloured horizontal line in Fig. 3a).

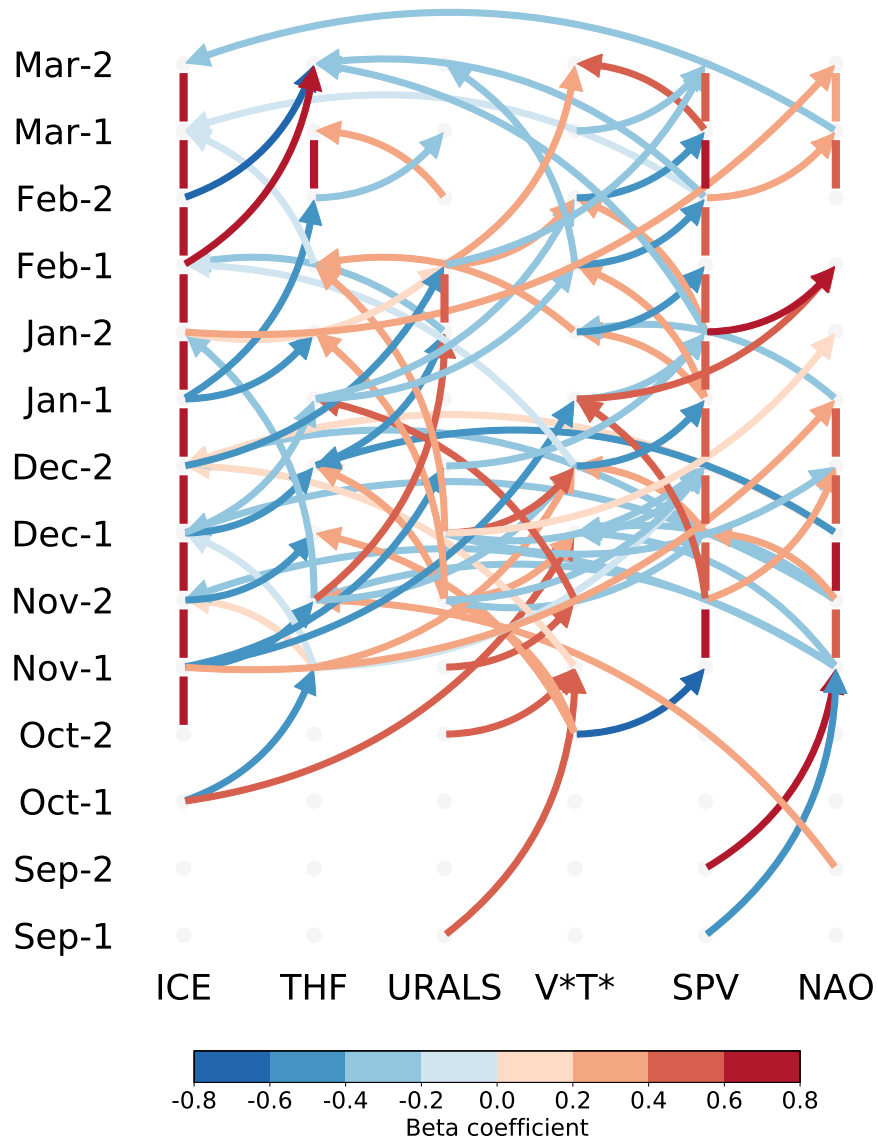

Figure S2: The unaggregated version of the half-monthly CEN, equivalent to Fig. S1b after aggregation.

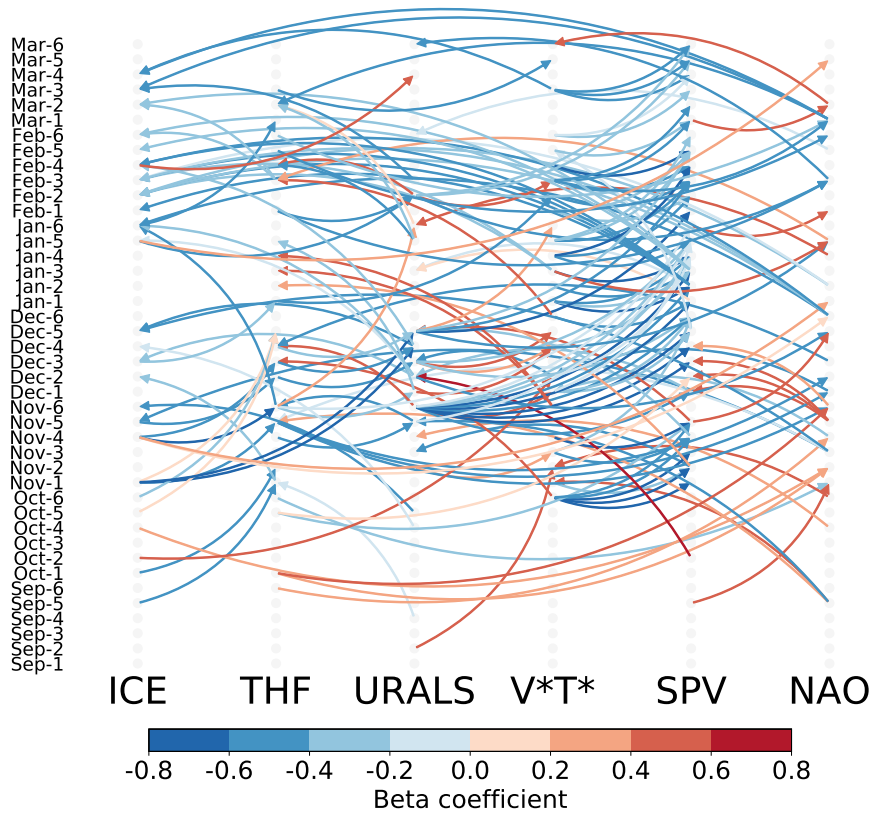

Figure S3: Pentad version of the monthly (Fig. 3a, S1a) and half-monthly (Fig. 3b, S1b) CENs. A 1% significance level is used in the second step (see Data and Methods 2.2). A maximum lag of 12 pentads (i.e., 2 months) is allowed. Autocorrelation is not used to reject causal linkages in the partial correlation tests here.

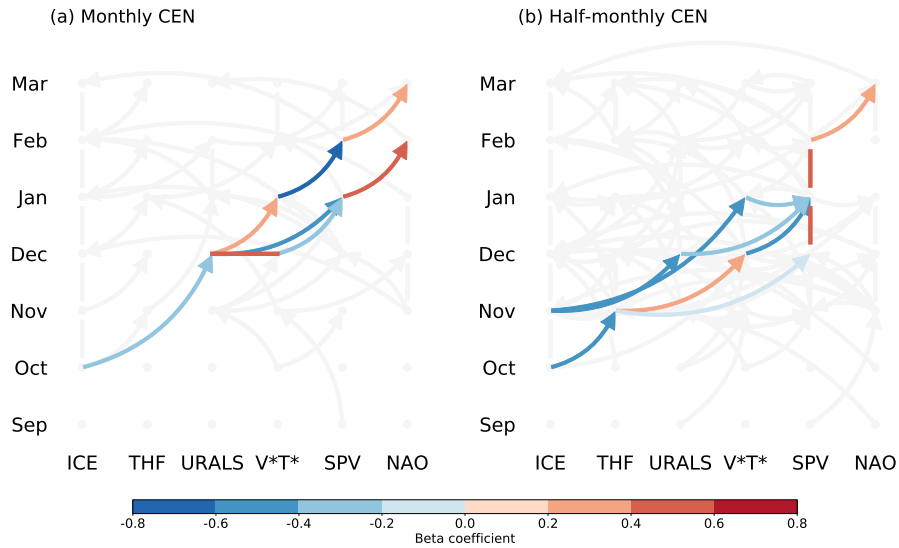

Figure S4: As in Fig. 3, but using AIC with another significance set (5%, 10%, 20%, 30%, 40%, 50%).

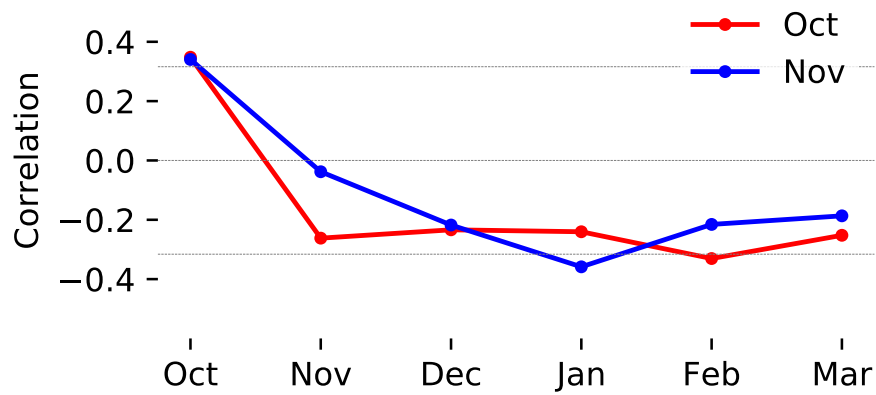

Figure S5: The correlation between October (red) and November (blue) Barents-Kara sea ice indices, and NAO from October to March. Outer grey lines show significant correlations at a 5% level using a two-tailed t-test.

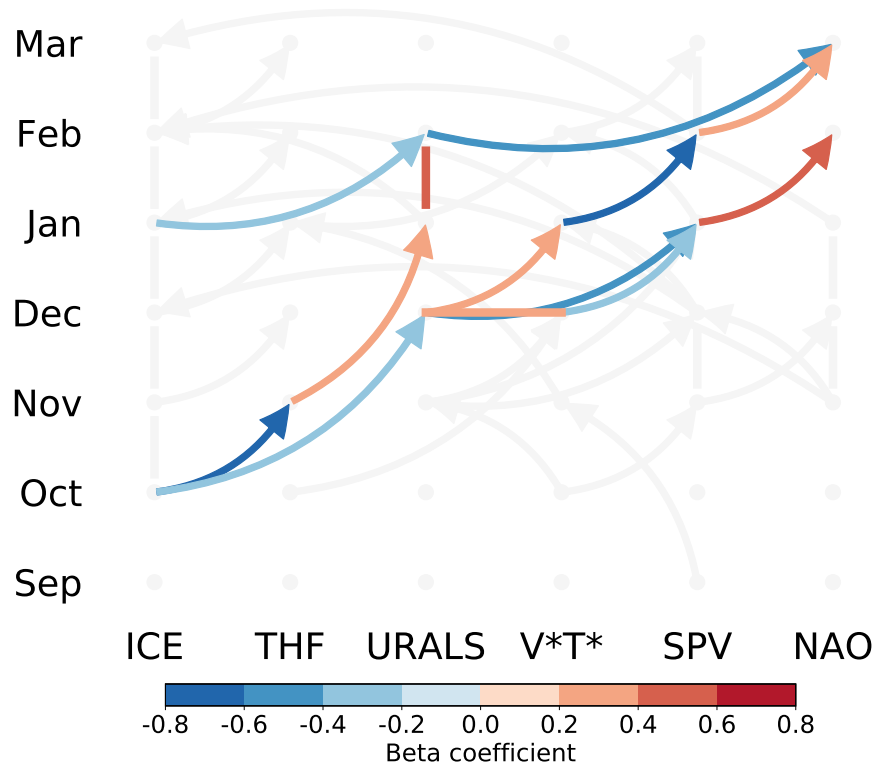

Figure S6: As in Fig. 3a, but highlighting all ICE-NAO strato-spheric and tropospheric pathways.

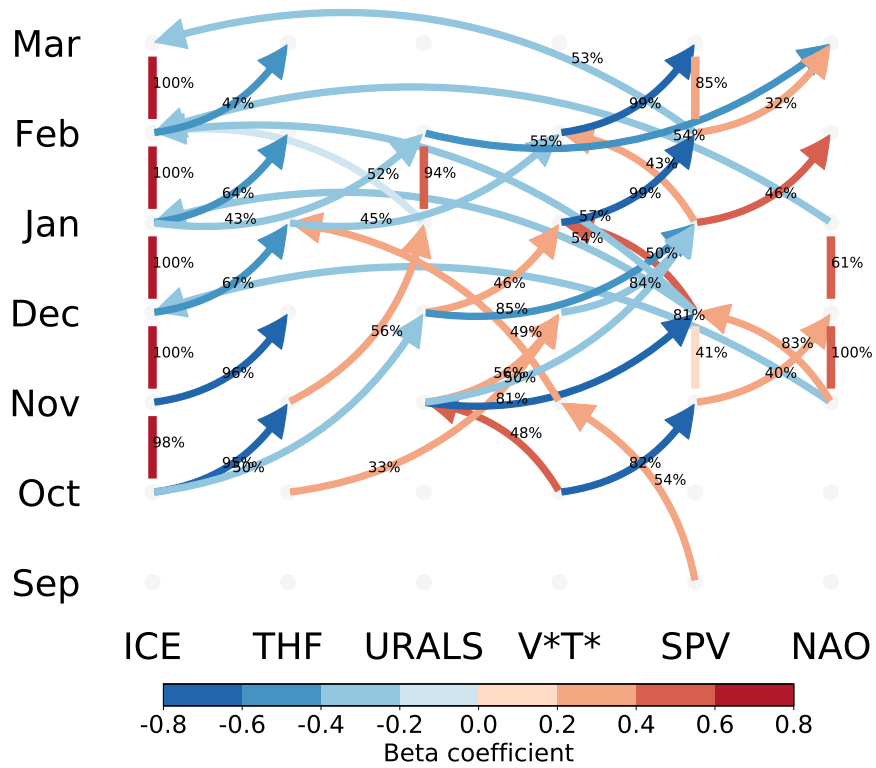

Figure S7: Same as Fig. S1a, but additionally showing the occur-rences rates of all linkages in the bootstrapping test.



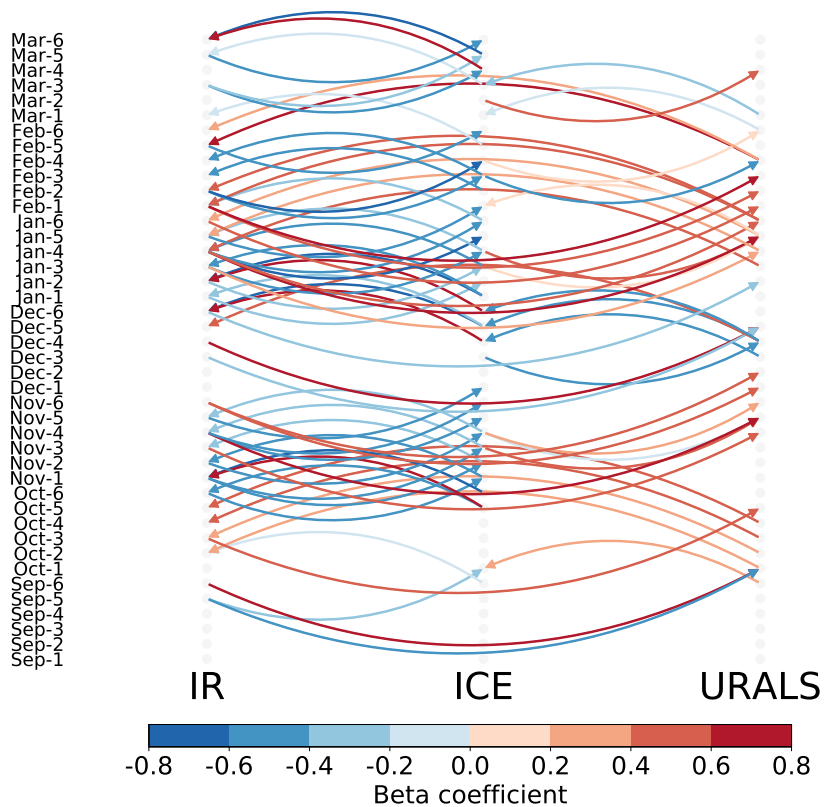

Figure S8: Results of the pentad CEN analysis assessing relationships between downward longwave radiation (IR), Barents-Kara sea ice (ICE) and Urals sea level pressure (URALS). A maximum lag of 2 pentads is allowed. Autocorrelation is not calculated. Fig. 7 is aggregated from this figure by summing the number of times each linkage appears in individual months.

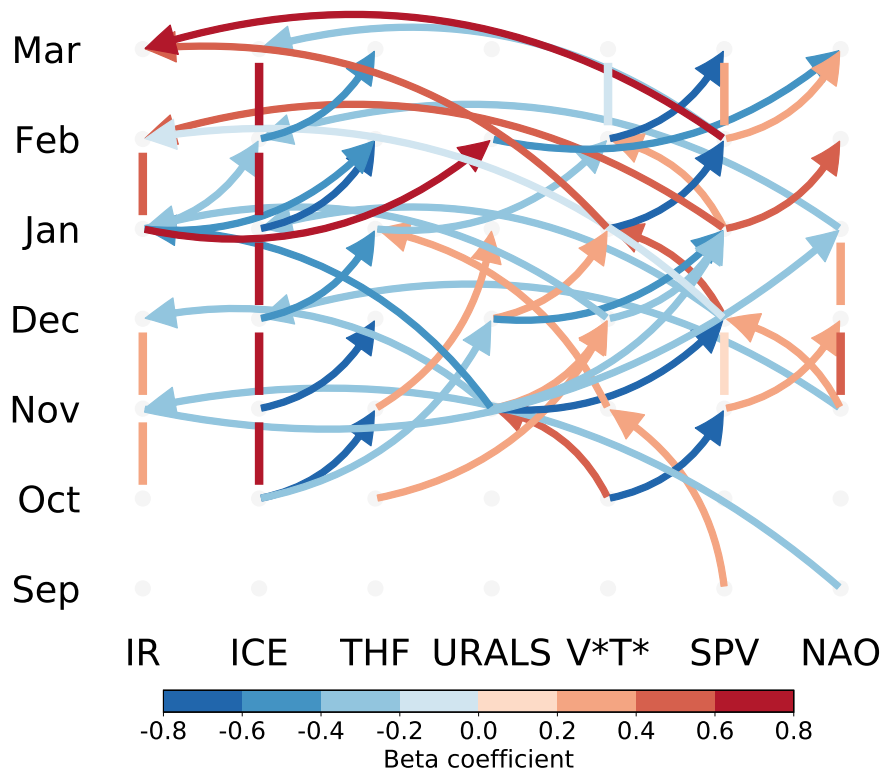

Figure S9: Monthly CEN as in Fig. S1a, but with the addition of downward longwave radiation (IR).
